# Supplementary material
Source: publisher figshare collection journal article supplement (https://diabetesjournals.figshare.com/ndownloader/files/25215143)
Supplement: Supplementary file 1 [file 25215143]

**Supplementary Table 1:** Characteristics of eligible patients and CGM Users. Continuous variables are presented as median (interquartile range). Analysis of variance was used in three-factor analysis comparing NHW, NHB and Hispanic patients\*\*. For comparison between two race/ethnicities, a chi-squared test was used for categorical variables and Mann Whitney U test for continuous variables. Where appropriate, Bonferroni adjustment was performed and a p-value < 0.05 was considered statistically significant.

\*Includes only patients who started to use CGM > 1 year after diagnosis (n= 293 NHW, 56 NHB, 20 Hispanic patients). \*\*Analysis of variance

|                                             | NHW              | NHB              | Hispanic         | **p-value | p-value (NHW v NHB) | p-value (NHW v Hispanic) | p-value (NHB v Hispanic) |
|---------------------------------------------|------------------|------------------|------------------|-----------|---------------------|--------------------------|--------------------------|
| <b>All Eligible Children, n</b>             | 1105             | 279              | 125              |           |                     |                          |                          |
| Female Sex, n (%)                           | 466 (42.2%)      | 135 (48.4%)      | 59 (47.2%)       | 0.1       | 0.18                | 0.9                      | 0.9                      |
| Age at Diagnosis, years                     | 8.4 (5.2, 12.0)  | 8.4 (4.8, 11.4)  | 7.7 (4.8, 10.7)  | 0.5       | 0.9                 | 0.9                      | 0.9                      |
| Government Insurance, n (%)                 | 238 (21.5%)      | 173 (62.0%)      | 82 (65.6%)       | < 0.001   | <0.001              | < 0.001                  | 0.9                      |
|                                             |                  |                  |                  |           |                     |                          |                          |
| <b>CGM Users, n (%)</b>                     | 600/1105 (54.3%) | 85/279 (30.5%)   | 41/125 (32.8%)   | <0.001    | <0.001              | < 0.001                  | 0.9                      |
| Female Sex, n (%)                           | 264 (44%)        | 41 (48%)         | 20 (48.8%)       | 0.7       | 0.9                 | 0.9                      | 0.9                      |
| Age at diagnosis, years                     | 8.1 (5.1, 11.4)  | 7.1 (4.2, 10.1)  | 7.2 (4.5, 10.4)  | 0.1       | 0.18                | 0.6                      | 0.9                      |
| Government Insurance, n (%)                 | 101/600 (16.8%)  | 46/85 (54.1%)    | 23/41 (56.1%)    | <0.001    | <0.001              | <0.001                   | 0.9                      |
| Age at CGM start, years                     | 13.2 (9.5, 16.2) | 13.3 (9.2, 15.3) | 10.8 (7.4, 16.3) | 0.3       | 0.9                 | 0.3                      | 0.9                      |
| Time between diagnosis and CGM start, years | 2.6 (0.6, 6.6)   | 3.5 (1.1, 8.1)   | 1.7 (0.7, 6.8)   | 0.1       | 0.15                | 0.9                      | 0.6                      |
| *HbA1c % at start of CGM (%)                | 8.1 (7.3, 8.8)   | 8.9 (8.0, 10.7)  | 8.5 (7.8, 10.2)  | < 0.001   | <0.001              | 0.09                     | 0.9                      |
| Dexcom Users                                | 515/600 (85%)    | 80/85 (94%)      | 36/41 (87.8%)    | 0.1       | 0.09                | 0.9                      | 0.6                      |
| CGM users at 6 months, n (%)                | 417/489 (85.3%)  | 50/76 (65.8%)    | 28/33 (84.8%)    | <0.001    | <0.001              | 0.9                      | 0.12                     |

|                            |                 |               |               |        |        |     |      |
|----------------------------|-----------------|---------------|---------------|--------|--------|-----|------|
| CGM users at 1 year, n (%) | 420/486 (86.4%) | 47/77 (61.0%) | 28/33 (84.8%) | <0.001 | <0.001 | 0.9 | 0.03 |
|----------------------------|-----------------|---------------|---------------|--------|--------|-----|------|

**Supplementary Table 2:** Logistic Regression Predicting Likelihood of CGM Initiation and Continued Use at 1-year based on Race, Insurance Type, Gender, and Age at Diagnosis

|                                    | <i>B</i> | SE   | Wald | <i>df</i> | <i>p</i> | Odds Ratio | 95% CI     |
|------------------------------------|----------|------|------|-----------|----------|------------|------------|
| <b>CGM Initiation</b>              |          |      |      |           |          |            |            |
| NHW                                |          |      | 32.4 | 2         | <0.001   |            |            |
| NHB                                | -0.8     | 0.2  | 27.2 | 1         | <0.001   | 0.5        | 0.3 – 0.6  |
| Hispanic                           | -0.7     | 0.2  | 10.3 | 1         | 0.001    | 0.5        | 0.3 – 0.8  |
| Insurance                          | -0.6     | 0.1  | 24.4 | 1         | <0.001   | 0.5        | 0.4 – 0.7  |
| Gender                             | -0.1     | 0.1  | 0.9  | 1         | 0.3      | 0.9        | 0.7 – 1.1  |
| Age at diagnosis                   | -0.04    | 0.01 | 11.5 | 1         | 0.001    | 0.96       | 0.9 – 0.98 |
| Constant                           | 0.7      | 0.1  | 27.1 | 1         | <0.001   | 2.1        |            |
| <b>CGM Continued Use at 1-year</b> |          |      |      |           |          |            |            |
| NHW                                |          |      | 22.9 | 2         | <0.001   |            |            |
| NHB                                | -1.4     | 0.3  | 22.4 | 1         | <0.001   | 0.3        | 0.1 – 0.4  |
| Hispanic                           | -0.1     | 0.5  | 0.04 | 1         | 0.8      | 0.9        | 0.3 – 2.5  |
| Insurance                          | -0.2     | 0.3  | 0.8  | 1         | 0.4      | 0.8        | 0.5 – 1.3  |
| Gender                             | -0.3     | 0.2  | 1.6  | 1         | 0.2      | 0.8        | 0.5 – 1.2  |
| Age at diagnosis                   | -0.03    | 0.03 | 1.5  | 1         | 0.2      | 0.97       | 0.9 – 1    |
| Constant                           | 2.4      | 0.3  | 57.1 | 1         | <0.001   | 10.6       |            |
